# Supplementary material for: Multi-Omics Analyses Reveal the Molecular Mechanisms Underlying the Adaptation of Wheat (Triticum aestivum L.) to Potassium Deprivation
Source: Front Plant Sci. 2020 Oct 6;11:588994. doi: 10.3389/fpls.2020.588994 (PMC7573229; doi:10.3389/fpls.2020.588994)
Supplement: Supplementary Table 10 — Transcription factors (TFs) identified among the differentially expressed genes. [file Table_10.XLSX]

## Sheet: S10
Table S10. Transcription factors (TFs) identified among the differentially expressed genes.
Comparison	No.	Gene id	TF Family
KN9204	1	TraesCS4D02G291300	AP2
	2	TraesCS1D02G000200	ARF
	3	TraesCS1D02G009400	ARF
	4	TraesCS6B02G066100	ARF
	5	TraesCS5A02G320300	ARR-B
	6	TraesCS5D02G326200	ARR-B
	7	TraesCS7D02G148200	ARR-B
	8	TraesCS4A02G263600	B3
	9	TraesCS4B02G051100	B3
	10	TraesCS4B02G319900	B3
	11	TraesCS4D02G051200	B3
	12	TraesCS5B02G435600	B3
	13	TraesCS5D02G440800	B3
	14	TraesCS5D02G441300	B3
	15	TraesCS6A02G245400	B3
	16	TraesCS6A02G382400	B3
	17	TraesCS6A02G382600	B3
	18	TraesCS2A02G094500	B3
	19	TraesCS2A02G094700	B3
	20	TraesCS2A02G411700	B3
	21	TraesCS2A02G422300	B3
	22	TraesCS2A02G476800	B3
	23	TraesCS2B02G109700	B3
	24	TraesCS2B02G413000	B3
	25	TraesCS2D02G409000	B3
	26	TraesCS2A02G476600	B3
	27	TraesCS2A02G476700	B3
	28	TraesCS4A02G269400	B3
	29	TraesCS5A02G294600	B3
	30	TraesCS5B02G392500	B3
	31	TraesCS5D02G302000	B3
	32	TraesCS5D02G372900	B3
	33	TraesCS5D02G527700	B3
	34	TraesCS6D02G035600	B3
	35	TraesCS6D02G035900	B3
	36	TraesCS6D02G227800	B3
	37	TraesCS7B02G017100	B3
	38	TraesCS7B02G461000	B3
	39	TraesCS7D02G233900	B3
	40	TraesCS7D02G526400	B3
	41	TraesCSU02G192700	B3
	42	TraesCS6B02G271200	bHLH
	43	TraesCS6D02G235700	bHLH
	44	TraesCS7A02G117100	bHLH
	45	TraesCS2A02G461700	bHLH
	46	TraesCS2A02G484700	bHLH
	47	TraesCS2A02G538500	bHLH
	48	TraesCS2B02G510800	bHLH
	49	TraesCS2B02G568700	bHLH
	50	TraesCS2D02G163900	bHLH
	51	TraesCS2D02G484600	bHLH
	52	TraesCS2D02G539300	bHLH
	53	TraesCS3A02G102600	bHLH
	54	TraesCS3B02G120500	bHLH
	55	TraesCS3D02G104800	bHLH
	56	TraesCS4D02G329000	bHLH
	57	TraesCS5A02G179000	bZIP
	58	TraesCS5D02G183500	bZIP
	59	TraesCS1B02G439800	bZIP
	60	TraesCS7D02G527500	bZIP
	61	TraesCS1D02G417100	bZIP
	62	TraesCS2B02G556600	bZIP
	63	TraesCS3D02G365200	bZIP
	64	TraesCS4D02G185500	bZIP
	65	TraesCS4D02G141500	C2H2
	66	TraesCS5A02G477800	C2H2
	67	TraesCS5B02G490300	C2H2
	68	TraesCS5D02G102100	C2H2
	69	TraesCS5D02G490600	C2H2
	70	TraesCS7D02G543200	C2H2
	71	TraesCSU02G125200	C2H2
	72	TraesCS1A02G060200	C2H2
	73	TraesCS4A02G174100	C2H2
	74	TraesCS6B02G191900	C2H2
	75	TraesCS7D02G188500	C2H2
	76	TraesCSU02G125500	C2H2
	77	TraesCS3A02G404900	CAMTA
	78	TraesCS3B02G506600	CAMTA
	79	TraesCS3D02G518600	CAMTA
	80	TraesCS1B02G062300	CAMTA
	81	TraesCS1A02G048100	CAMTA
	82	TraesCS5A02G261200	CAMTA
	83	TraesCS6B02G153100	CAMTA
	84	TraesCS6B02G415100	CAMTA
	85	TraesCS7B02G415400	CAMTA
	86	TraesCS7D02G085800	CAMTA
	87	TraesCS1D02G049000	CAMTA
	88	TraesCS7D02G519800	CAMTA
	89	TraesCS2A02G215800	CAMTA
	90	TraesCS2A02G216500	CAMTA
	91	TraesCS2B02G329800	CAMTA
	92	TraesCS2D02G311300	CAMTA
	93	TraesCS3A02G008900	CAMTA
	94	TraesCS1A02G017700	CAMTA
	95	TraesCS1A02G048000	CAMTA
	96	TraesCS1A02G273600	CAMTA
	97	TraesCS1A02G340300	CAMTA
	98	TraesCS1A02G422700	CAMTA
	99	TraesCS1B02G109400	CAMTA
	100	TraesCS1D02G058800	CAMTA
	101	TraesCS2A02G071800	CAMTA
	102	TraesCS2A02G071900	CAMTA
	103	TraesCS2A02G461800	CAMTA
	104	TraesCS2A02G466900	CAMTA
	105	TraesCS2B02G007400	CAMTA
	106	TraesCS2B02G059400	CAMTA
	107	TraesCS2B02G067000	CAMTA
	108	TraesCS2D02G070600	CAMTA
	109	TraesCS2D02G070700	CAMTA
	110	TraesCS2D02G419800	CAMTA
	111	TraesCS2D02G462000	CAMTA
	112	TraesCS2D02G486300	CAMTA
	113	TraesCS2D02G551200	CAMTA
	114	TraesCS3B02G550900	CAMTA
	115	TraesCS3D02G003900	CAMTA
	116	TraesCS4A02G223900	CAMTA
	117	TraesCS4A02G384600	CAMTA
	118	TraesCS4A02G391400	CAMTA
	119	TraesCS4B02G328400	CAMTA
	120	TraesCS5A02G035200	CAMTA
	121	TraesCS5A02G035300	CAMTA
	122	TraesCS5A02G051200	CAMTA
	123	TraesCS5B02G035100	CAMTA
	124	TraesCS5B02G294100	CAMTA
	125	TraesCS5B02G454100	CAMTA
	126	TraesCS5B02G455500	CAMTA
	127	TraesCS5D02G043400	CAMTA
	128	TraesCS5D02G043500	CAMTA
	129	TraesCS5D02G188700	CAMTA
	130	TraesCS5D02G268600	CAMTA
	131	TraesCS5D02G365500	CAMTA
	132	TraesCS5D02G374600	CAMTA
	133	TraesCS5D02G375200	CAMTA
	134	TraesCS5D02G375400	CAMTA
	135	TraesCS5D02G405800	CAMTA
	136	TraesCS5D02G477400	CAMTA
	137	TraesCS5D02G520500	CAMTA
	138	TraesCS5D02G520800	CAMTA
	139	TraesCS6A02G125400	CAMTA
	140	TraesCS6A02G132400	CAMTA
	141	TraesCS6A02G225300	CAMTA
	142	TraesCS6A02G236300	CAMTA
	143	TraesCS6A02G342000	CAMTA
	144	TraesCS6B02G153500	CAMTA
	145	TraesCS6B02G153700	CAMTA
	146	TraesCS6B02G174100	CAMTA
	147	TraesCS6B02G256300	CAMTA
	148	TraesCS6B02G278900	CAMTA
	149	TraesCS6B02G368800	CAMTA
	150	TraesCS6B02G454800	CAMTA
	151	TraesCS6B02G458200	CAMTA
	152	TraesCS6D02G115700	CAMTA
	153	TraesCS6D02G115900	CAMTA
	154	TraesCS6D02G116100	CAMTA
	155	TraesCS6D02G135000	CAMTA
	156	TraesCS6D02G191500	CAMTA
	157	TraesCS6D02G219000	CAMTA
	158	TraesCS6D02G318900	CAMTA
	159	TraesCS7A02G390300	CAMTA
	160	TraesCS7A02G461300	CAMTA
	161	TraesCS7A02G532700	CAMTA
	162	TraesCS7D02G386000	CAMTA
	163	TraesCS7D02G480100	CAMTA
	164	TraesCSU02G207400	CAMTA
	165	TraesCS2B02G372000	CO-like
	166	TraesCS2D02G351900	CO-like
	167	TraesCS4A02G140600	CO-like
	168	TraesCS7D02G131700	CO-like
	169	TraesCS3A02G180600	Dof
	170	TraesCS3D02G185500	Dof
	171	TraesCS6A02G287700	Dof
	172	TraesCS6B02G317100	Dof
	173	TraesCS6D02G268400	Dof
	174	TraesCS2A02G100800	Dof
	175	TraesCS1A02G171300	Dof
	176	TraesCS2A02G590800	Dof
	177	TraesCS2B02G592700	Dof
	178	TraesCS2D02G100300	Dof
	179	TraesCS2D02G563200	Dof
	180	TraesCS4A02G035400	ERF
	181	TraesCS4D02G267500	ERF
	182	TraesCS5B02G214400	ERF
	183	TraesCS5B02G312700	ERF
	184	TraesCS5B02G312800	ERF
	185	TraesCS5B02G312900	ERF
	186	TraesCS7A02G057800	ERF
	187	TraesCS7D02G052400	ERF
	188	TraesCS7D02G469200	ERF
	189	TraesCS1A02G436000	ERF
	190	TraesCS2D02G397000	ERF
	191	TraesCS5A02G180800	ERF
	192	TraesCS5D02G185300	ERF
	193	TraesCS6A02G120000	ERF
	194	TraesCS7A02G553600	ERF
	195	TraesCS7D02G018900	ERF
	196	TraesCS7D02G022300	ERF
	197	TraesCS7D02G052500	ERF
	198	TraesCS7D02G052600	ERF
	199	TraesCS1D02G096200	FAR1
	200	TraesCS5B02G406300	G2-like
	201	TraesCS5D02G545700	G2-like
	202	TraesCS2A02G497100	G2-like
	203	TraesCS2D02G390000	GATA
	204	TraesCS6D02G089000	HB-PHD
	205	TraesCS4A02G059600	HD-ZIP
	206	TraesCS4B02G235300	HD-ZIP
	207	TraesCS1B02G393100	HD-ZIP
	208	TraesCS2B02G407600	HD-ZIP
	209	TraesCS6B02G284300	HD-ZIP
	210	TraesCS4B02G383300	HSF
	211	TraesCS3A02G280800	HSF
	212	TraesCS4B02G383400	HSF
	213	TraesCS7B02G272500	HSF
	214	TraesCS1A02G366100	MYB
	215	TraesCS4A02G173300	MYB
	216	TraesCS1A02G042700	MYB
	217	TraesCS4B02G143700	MYB
	218	TraesCS4D02G142300	MYB
	219	TraesCS5A02G205200	MYB
	220	TraesCS5B02G203100	MYB
	221	TraesCS5B02G216900	MYB
	222	TraesCS5D02G210900	MYB
	223	TraesCS6A02G037700	MYB
	224	TraesCS1B02G279400	MYB
	225	TraesCS6A02G368200	MYB
	226	TraesCS6B02G349200	MYB
	227	TraesCS6D02G043600	MYB
	228	TraesCS6D02G351500	MYB
	229	TraesCS7B02G138200	MYB
	230	TraesCS7B02G355200	MYB
	231	TraesCS1D02G268900	MYB
	232	TraesCS2D02G209600	MYB
	233	TraesCS2D02G543500	MYB
	234	TraesCS1A02G268800	MYB
	235	TraesCS1A02G365900	MYB
	236	TraesCS1B02G100600	MYB
	237	TraesCS1B02G383700	MYB
	238	TraesCS1B02G383800	MYB
	239	TraesCS1D02G307500	MYB
	240	TraesCS1D02G371500	MYB
	241	TraesCS1D02G371700	MYB
	242	TraesCS1D02G371800	MYB
	243	TraesCS2A02G370300	MYB
	244	TraesCS2D02G366800	MYB
	245	TraesCS3D02G255400	MYB
	246	TraesCS4B02G231300	MYB
	247	TraesCS4B02G344000	MYB
	248	TraesCS5A02G217900	MYB
	249	TraesCS5A02G320500	MYB
	250	TraesCS5D02G128200	MYB
	251	TraesCS5D02G326600	MYB
	252	TraesCS7A02G205100	MYB
	253	TraesCS7A02G304500	MYB
	254	TraesCS7D02G208000	MYB
	255	TraesCS7D02G300000	MYB
	256	TraesCS1A02G290400	MYB_related
	257	TraesCS3B02G311700	MYB_related
	258	TraesCS3D02G033800	MYB_related
	259	TraesCS3D02G109100	MYB_related
	260	TraesCS3D02G417500	MYB_related
	261	TraesCS1B02G007900	MYB_related
	262	TraesCS4A02G099100	MYB_related
	263	TraesCS4A02G140000	MYB_related
	264	TraesCS4A02G313600	MYB_related
	265	TraesCS4B02G205200	MYB_related
	266	TraesCS4D02G246300	MYB_related
	267	TraesCS4D02G271000	MYB_related
	268	TraesCS4D02G271100	MYB_related
	269	TraesCS5A02G090600	MYB_related
	270	TraesCS5B02G491500	MYB_related
	271	TraesCS5B02G566100	MYB_related
	272	TraesCS5D02G095600	MYB_related
	273	TraesCS5D02G206200	MYB_related
	274	TraesCS5D02G374000	MYB_related
	275	TraesCS5D02G447000	MYB_related
	276	TraesCS5D02G491900	MYB_related
	277	TraesCS6A02G071100	MYB_related
	278	TraesCS6A02G261100	MYB_related
	279	TraesCS6A02G297500	MYB_related
	280	TraesCS6A02G315800	MYB_related
	281	TraesCS1B02G308900	MYB_related
	282	TraesCS6B02G288500	MYB_related
	283	TraesCS6B02G327200	MYB_related
	284	TraesCS6B02G383600	MYB_related
	285	TraesCS6D02G069000	MYB_related
	286	TraesCS6D02G241900	MYB_related
	287	TraesCS6D02G303200	MYB_related
	288	TraesCS7A02G003600	MYB_related
	289	TraesCS7A02G242200	MYB_related
	290	TraesCS7A02G427100	MYB_related
	291	TraesCS7B02G372500	MYB_related
	292	TraesCS7D02G211000	MYB_related
	293	TraesCS7D02G523800	MYB_related
	294	TraesCS7D02G540700	MYB_related
	295	TraesCSU02G076600	MYB_related
	296	TraesCSU02G226400	MYB_related
	297	TraesCS1D02G096300	MYB_related
	298	TraesCS1D02G220500	MYB_related
	299	TraesCS2B02G478700	MYB_related
	300	TraesCS1A02G218800	MYB_related
	301	TraesCS2D02G417800	MYB_related
	302	TraesCS2D02G543600	MYB_related
	303	TraesCS1A02G295800	MYB_related
	304	TraesCS1A02G326800	MYB_related
	305	TraesCS1B02G304800	MYB_related
	306	TraesCS1B02G425500	MYB_related
	307	TraesCS1D02G296500	MYB_related
	308	TraesCS1D02G388600	MYB_related
	309	TraesCS1D02G425100	MYB_related
	310	TraesCS2A02G456600	MYB_related
	311	TraesCS2A02G483300	MYB_related
	312	TraesCS2B02G124500	MYB_related
	313	TraesCS2B02G454100	MYB_related
	314	TraesCS2D02G456900	MYB_related
	315	TraesCS3A02G122500	MYB_related
	316	TraesCS3B02G269700	MYB_related
	317	TraesCS4D02G225900	MYB_related
	318	TraesCS5A02G248600	MYB_related
	319	TraesCS5A02G354600	MYB_related
	320	TraesCS5A02G354800	MYB_related
	321	TraesCS5A02G547700	MYB_related
	322	TraesCS5B02G442800	MYB_related
	323	TraesCS5D02G361800	MYB_related
	324	TraesCS6B02G346200	MYB_related
	325	TraesCS6D02G295000	MYB_related
	326	TraesCS7A02G036100	MYB_related
	327	TraesCS7B02G058200	MYB_related
	328	TraesCS7D02G032700	MYB_related
	329	TraesCS7D02G080400	MYB_related
	330	TraesCS7D02G262400	MYB_related
	331	TraesCS4A02G131000	NAC
	332	TraesCS4B02G173600	NAC
	333	TraesCS1B02G125100	NAC
	334	TraesCS5A02G143200	NAC
	335	TraesCS5B02G054200	NAC
	336	TraesCS5B02G142100	NAC
	337	TraesCS5D02G059700	NAC
	338	TraesCS5D02G148800	NAC
	339	TraesCS6A02G378600	NAC
	340	TraesCS6B02G416300	NAC
	341	TraesCS6D02G362900	NAC
	342	TraesCS7B02G160900	NAC
	343	TraesCS7B02G472600	NAC
	344	TraesCS7D02G062100	NAC
	345	TraesCS7D02G263800	NAC
	346	TraesCS2A02G101900	NAC
	347	TraesCS2A02G102000	NAC
	348	TraesCS2A02G338300	NAC
	349	TraesCS2B02G343600	NAC
	350	TraesCS2A02G101000	NAC
	351	TraesCS2A02G201800	NAC
	352	TraesCS2A02G311500	NAC
	353	TraesCS2B02G355600	NAC
	354	TraesCS2D02G101400	NAC
	355	TraesCS3D02G245500	NAC
	356	TraesCS3D02G381900	NAC
	357	TraesCS4A02G421000	NAC
	358	TraesCS7A02G068000	NAC
	359	TraesCS7A02G518800	NF-X1
	360	TraesCS2A02G173500	NF-YB
	361	TraesCS2B02G199800	NF-YB
	362	TraesCS2D02G180700	NF-YB
	363	TraesCS2B02G409300	NF-YC
	364	TraesCS2D02G388800	NF-YC
	365	TraesCS5B02G552800	Nin-like
	366	TraesCS5B02G553000	Nin-like
	367	TraesCS5B02G553100	Nin-like
	368	TraesCS5D02G538900	Nin-like
	369	TraesCS5D02G539500	Nin-like
	370	TraesCS2D02G336600	Nin-like
	371	TraesCS5B02G436300	Nin-like
	372	TraesCS5B02G439500	Nin-like
	373	TraesCS5D02G444000	Nin-like
	374	TraesCS6D02G308500	Nin-like
	375	TraesCS7A02G208000	SBP
	376	TraesCS3D02G390100	Trihelix
	377	TraesCS5A02G353800	Trihelix
	378	TraesCS6A02G368400	Trihelix
	379	TraesCS6B02G403900	Trihelix
	380	TraesCS3A02G233800	WRKY
	381	TraesCS1A02G025600	WRKY
	382	TraesCS3B02G265500	WRKY
	383	TraesCS1A02G358400	WRKY
	384	TraesCS3D02G219600	WRKY
	385	TraesCS4D02G172200	WRKY
	386	TraesCS5B02G304900	WRKY
	387	TraesCS5D02G311300	WRKY
	388	TraesCS1B02G471600	WRKY
	389	TraesCS7D02G110600	WRKY
	390	TraesCS7D02G345700	WRKY
	391	TraesCS2A02G161500	WRKY
	392	TraesCS2A02G489500	WRKY
	393	TraesCS2B02G187500	WRKY
	394	TraesCS2B02G517400	WRKY
	395	TraesCS2D02G168600	WRKY
	396	TraesCS2D02G489700	WRKY
	397	TraesCS1A02G016400	WRKY
	398	TraesCS1A02G025500	WRKY
	399	TraesCS1A02G410500	WRKY
	400	TraesCS1B02G020400	WRKY
	401	TraesCS1B02G440300	WRKY
	402	TraesCS1D02G015500	WRKY
	403	TraesCS1D02G016900	WRKY
	404	TraesCS1D02G418000	WRKY
	405	TraesCS1D02G454100	WRKY
	406	TraesCS2B02G180600	WRKY
	407	TraesCS2B02G486400	WRKY
	408	TraesCS3A02G519800	WRKY
	409	TraesCS3B02G587400	WRKY
	410	TraesCS3D02G056400	WRKY
	411	TraesCS4A02G448000	WRKY
	412	TraesCS4A02G454400	WRKY
	413	TraesCS4A02G493600	WRKY
	414	TraesCS4B02G170100	WRKY
	415	TraesCS4D02G089800	WRKY
	416	TraesCS5A02G146600	WRKY
	417	TraesCS5A02G304400	WRKY
	418	TraesCS5D02G032300	WRKY
	419	TraesCS6B02G034700	WRKY
	420	TraesCS6D02G052200	WRKY
	421	TraesCS6D02G399200	WRKY
	422	TraesCS7A02G044300	WRKY
	423	TraesCS7A02G116000	WRKY
	424	TraesCS7A02G464600	WRKY
	425	TraesCS7B02G012600	WRKY
	426	TraesCS7B02G453500	WRKY
	427	TraesCS7D02G005500	WRKY
	428	TraesCSU02G064200	WRKY
	429	TraesCSU02G168400	WRKY
	430	TraesCSU02G203600	WRKY
BN207	431	TraesCS4D02G237300	AP2
	432	TraesCS4D02G291300	AP2
	433	TraesCS5A02G141700	AP2
	434	TraesCS5D02G150500	AP2
	435	TraesCS5A02G382600	ARF
	436	TraesCS7A02G371500	ARF
	437	TraesCS1D02G000200	ARF
	438	TraesCS1D02G009400	ARF
	439	TraesCS7B02G431100	ARF
	440	TraesCS7D02G351400	ARF
	441	TraesCS1D02G337500	ARF
	442	TraesCS2A02G197800	ARF
	443	TraesCS2B02G225200	ARF
	444	TraesCS1D02G000300	ARF
	445	TraesCS4B02G108600	ARF
	446	TraesCS5A02G038300	ARF
	447	TraesCS5B02G039800	ARF
	448	TraesCS4D02G239900	ARR-B
	449	TraesCS5A02G320300	ARR-B
	450	TraesCS5B02G320500	ARR-B
	451	TraesCS5D02G326200	ARR-B
	452	TraesCS6A02G146200	ARR-B
	453	TraesCS6A02G359200	ARR-B
	454	TraesCS6D02G135500	ARR-B
	455	TraesCS6D02G342200	ARR-B
	456	TraesCS2A02G551100	ARR-B
	457	TraesCS2B02G582300	ARR-B
	458	TraesCS2D02G552200	ARR-B
	459	TraesCS7B02G049000	ARR-B
	460	TraesCS1A02G287800	B3
	461	TraesCS3B02G167700	B3
	462	TraesCS3B02G410200	B3
	463	TraesCS3B02G429200	B3
	464	TraesCS1A02G383500	B3
	465	TraesCS3D02G391100	B3
	466	TraesCS4A02G030300	B3
	467	TraesCS4A02G055500	B3
	468	TraesCS4A02G134300	B3
	469	TraesCS4A02G263600	B3
	470	TraesCS1B02G051600	B3
	471	TraesCS4B02G051100	B3
	472	TraesCS4B02G301400	B3
	473	TraesCS4D02G051200	B3
	474	TraesCS4D02G274000	B3
	475	TraesCS4D02G299700	B3
	476	TraesCS5A02G299500	B3
	477	TraesCS5A02G352100	B3
	478	TraesCS5A02G432900	B3
	479	TraesCS5B02G301800	B3
	480	TraesCS5B02G435600	B3
	481	TraesCS1B02G221600	B3
	482	TraesCS1B02G225700	B3
	483	TraesCS5D02G308500	B3
	484	TraesCS5D02G354100	B3
	485	TraesCS5D02G361000	B3
	486	TraesCS5D02G373500	B3
	487	TraesCS5D02G441300	B3
	488	TraesCS6A02G245400	B3
	489	TraesCS6A02G260700	B3
	490	TraesCS6A02G382400	B3
	491	TraesCS6A02G382600	B3
	492	TraesCS6B02G082800	B3
	493	TraesCS6B02G421800	B3
	494	TraesCS6D02G063000	B3
	495	TraesCS6D02G367200	B3
	496	TraesCS6D02G367400	B3
	497	TraesCS7A02G103900	B3
	498	TraesCS7A02G131200	B3
	499	TraesCS7B02G017000	B3
	500	TraesCS7B02G019000	B3
	501	TraesCS7B02G060000	B3
	502	TraesCS7B02G292700	B3
	503	TraesCS7B02G460400	B3
	504	TraesCS7D02G156300	B3
	505	TraesCS1D02G040700	B3
	506	TraesCSU02G021200	B3
	507	TraesCS1D02G274300	B3
	508	TraesCS1D02G302100	B3
	509	TraesCS1D02G451200	B3
	510	TraesCS2A02G126100	B3
	511	TraesCS2A02G292000	B3
	512	TraesCS2A02G340000	B3
	513	TraesCS2A02G411700	B3
	514	TraesCS2A02G422300	B3
	515	TraesCS2A02G476800	B3
	516	TraesCS2B02G124800	B3
	517	TraesCS1A02G219500	B3
	518	TraesCS2D02G391500	B3
	519	TraesCS2D02G409000	B3
	520	TraesCS2A02G412000	B3
	521	TraesCS2A02G476300	B3
	522	TraesCS2A02G476700	B3
	523	TraesCS2A02G477000	B3
	524	TraesCS2B02G499900	B3
	525	TraesCS3A02G479900	B3
	526	TraesCS3D02G418200	B3
	527	TraesCS4A02G198300	B3
	528	TraesCS4A02G483900	B3
	529	TraesCS4B02G117100	B3
	530	TraesCS5A02G294600	B3
	531	TraesCS5A02G363700	B3
	532	TraesCS5B02G079200	B3
	533	TraesCS5B02G095900	B3
	534	TraesCS5D02G085900	B3
	535	TraesCS5D02G102200	B3
	536	TraesCS5D02G302000	B3
	537	TraesCS5D02G527700	B3
	538	TraesCS6B02G421700	B3
	539	TraesCS6D02G035800	B3
	540	TraesCS6D02G035900	B3
	541	TraesCS6D02G227800	B3
	542	TraesCS7A02G539900	B3
	543	TraesCS7B02G017100	B3
	544	TraesCS7B02G461000	B3
	545	TraesCS7D02G233900	B3
	546	TraesCS7D02G486300	B3
	547	TraesCS4B02G393500	BES1
	548	TraesCS5D02G258300	bHLH
	549	TraesCS6B02G271200	bHLH
	550	TraesCS6B02G334600	bHLH
	551	TraesCS6D02G235700	bHLH
	552	TraesCS6D02G285300	bHLH
	553	TraesCS7A02G117100	bHLH
	554	TraesCS2A02G461700	bHLH
	555	TraesCS2A02G484700	bHLH
	556	TraesCS2A02G538500	bHLH
	557	TraesCS2B02G510800	bHLH
	558	TraesCS2D02G163900	bHLH
	559	TraesCS2D02G484600	bHLH
	560	TraesCS2B02G464800	bHLH
	561	TraesCS3A02G102600	bHLH
	562	TraesCS3A02G102900	bHLH
	563	TraesCS3B02G120500	bHLH
	564	TraesCS3D02G104800	bHLH
	565	TraesCS4D02G058900	bHLH
	566	TraesCS5A02G194600	bHLH
	567	TraesCS1A02G409800	bZIP
	568	TraesCS5A02G057500	bZIP
	569	TraesCS5A02G179000	bZIP
	570	TraesCS5B02G235600	bZIP
	571	TraesCS5B02G444100	bZIP
	572	TraesCS5D02G183500	bZIP
	573	TraesCS5D02G447500	bZIP
	574	TraesCS6B02G124700	bZIP
	575	TraesCS1B02G439800	bZIP
	576	TraesCS7B02G391800	bZIP
	577	TraesCS7B02G464700	bZIP
	578	TraesCS7D02G527500	bZIP
	579	TraesCS1D02G417100	bZIP
	580	TraesCS2A02G467100	bZIP
	581	TraesCS4D02G185500	bZIP
	582	TraesCS5A02G143300	bZIP
	583	TraesCS5B02G059200	bZIP
	584	TraesCS5B02G142200	bZIP
	585	TraesCS5D02G148700	bZIP
	586	TraesCS6A02G170600	bZIP
	587	TraesCS5A02G090000	C2H2
	588	TraesCS5A02G331500	C2H2
	589	TraesCS5A02G477100	C2H2
	590	TraesCS5B02G076400	C2H2
	591	TraesCS5B02G095800	C2H2
	592	TraesCS5B02G410800	C2H2
	593	TraesCS5B02G490500	C2H2
	594	TraesCS5D02G102100	C2H2
	595	TraesCS5D02G490700	C2H2
	596	TraesCS6A02G238500	C2H2
	597	TraesCS1B02G394500	C2H2
	598	TraesCS7D02G543200	C2H2
	599	TraesCS2A02G459900	C2H2
	600	TraesCS1D02G331700	C2H2
	601	TraesCS3A02G371700	C2H2
	602	TraesCS3D02G364800	C2H2
	603	TraesCS5B02G156700	C2H2
	604	TraesCS6B02G191900	C2H2
	605	TraesCS6B02G410200	C2H2
	606	TraesCS7D02G188500	C2H2
	607	TraesCS7D02G289600	C2H2
	608	TraesCS3A02G107200	C3H
	609	TraesCS3A02G537700	C3H
	610	TraesCS3D02G109300	C3H
	611	TraesCS6B02G166600	C3H
	612	TraesCS2B02G109900	C3H
	613	TraesCS6B02G095100	C3H
	614	TraesCS7A02G508300	C3H
	615	TraesCS3D02G079200	CAMTA
	616	TraesCS1A02G422600	CAMTA
	617	TraesCS3D02G518600	CAMTA
	618	TraesCS4A02G005100	CAMTA
	619	TraesCS1B02G062300	CAMTA
	620	TraesCS4B02G207500	CAMTA
	621	TraesCS4D02G298800	CAMTA
	622	TraesCS6D02G063400	CAMTA
	623	TraesCS6D02G395900	CAMTA
	624	TraesCS7B02G415400	CAMTA
	625	TraesCS7B02G449500	CAMTA
	626	TraesCS7D02G085800	CAMTA
	627	TraesCS1D02G048900	CAMTA
	628	TraesCS1D02G049000	CAMTA
	629	TraesCS7D02G426000	CAMTA
	630	TraesCSU02G106200	CAMTA
	631	TraesCS1D02G126300	CAMTA
	632	TraesCS1D02G235800	CAMTA
	633	TraesCS1D02G431400	CAMTA
	634	TraesCS2A02G215900	CAMTA
	635	TraesCS2A02G216500	CAMTA
	636	TraesCS2A02G418300	CAMTA
	637	TraesCS2B02G241800	CAMTA
	638	TraesCS2B02G329800	CAMTA
	639	TraesCS2B02G532100	CAMTA
	640	TraesCS2D02G401500	CAMTA
	641	TraesCS2D02G415700	CAMTA
	642	TraesCS1A02G035700	CAMTA
	643	TraesCS1A02G048000	CAMTA
	644	TraesCS1A02G061500	CAMTA
	645	TraesCS1B02G031700	CAMTA
	646	TraesCS1B02G109400	CAMTA
	647	TraesCS1B02G408300	CAMTA
	648	TraesCS1B02G445300	CAMTA
	649	TraesCS2A02G071800	CAMTA
	650	TraesCS2A02G071900	CAMTA
	651	TraesCS2A02G129700	CAMTA
	652	TraesCS2A02G217300	CAMTA
	653	TraesCS2A02G461800	CAMTA
	654	TraesCS2B02G007400	CAMTA
	655	TraesCS2B02G086300	CAMTA
	656	TraesCS2B02G143400	CAMTA
	657	TraesCS2B02G151900	CAMTA
	658	TraesCS2B02G240900	CAMTA
	659	TraesCS2B02G242600	CAMTA
	660	TraesCS2B02G483400	CAMTA
	661	TraesCS2B02G536600	CAMTA
	662	TraesCS2D02G070600	CAMTA
	663	TraesCS2D02G070700	CAMTA
	664	TraesCS2D02G124300	CAMTA
	665	TraesCS2D02G130500	CAMTA
	666	TraesCS2D02G132000	CAMTA
	667	TraesCS2D02G221500	CAMTA
	668	TraesCS2D02G462000	CAMTA
	669	TraesCS2D02G466900	CAMTA
	670	TraesCS2D02G504400	CAMTA
	671	TraesCS2D02G509500	CAMTA
	672	TraesCS2D02G550900	CAMTA
	673	TraesCS2D02G551200	CAMTA
	674	TraesCS3A02G493900	CAMTA
	675	TraesCS3D02G011800	CAMTA
	676	TraesCS3D02G538300	CAMTA
	677	TraesCS4A02G223900	CAMTA
	678	TraesCS4A02G382900	CAMTA
	679	TraesCS4A02G391400	CAMTA
	680	TraesCS5A02G249600	CAMTA
	681	TraesCS5A02G294800	CAMTA
	682	TraesCS5A02G338300	CAMTA
	683	TraesCS5A02G365300	CAMTA
	684	TraesCS5A02G396300	CAMTA
	685	TraesCS5B02G294100	CAMTA
	686	TraesCS5B02G367200	CAMTA
	687	TraesCS5B02G367600	CAMTA
	688	TraesCS5B02G476500	CAMTA
	689	TraesCS5D02G268600	CAMTA
	690	TraesCS5D02G302200	CAMTA
	691	TraesCS5D02G374500	CAMTA
	692	TraesCS5D02G375200	CAMTA
	693	TraesCS5D02G375400	CAMTA
	694	TraesCS5D02G405800	CAMTA
	695	TraesCS6A02G003150	CAMTA
	696	TraesCS6A02G412700	CAMTA
	697	TraesCS6B02G133000	CAMTA
	698	TraesCS6B02G152300	CAMTA
	699	TraesCS6B02G152900	CAMTA
	700	TraesCS6B02G174100	CAMTA
	701	TraesCS6B02G368800	CAMTA
	702	TraesCS6D02G092300	CAMTA
	703	TraesCS6D02G115300	CAMTA
	704	TraesCS6D02G135000	CAMTA
	705	TraesCS6D02G210100	CAMTA
	706	TraesCS6D02G395600	CAMTA
	707	TraesCS7A02G091500	CAMTA
	708	TraesCS7A02G148600	CAMTA
	709	TraesCS7A02G461300	CAMTA
	710	TraesCS7A02G532700	CAMTA
	711	TraesCS7B02G052200	CAMTA
	712	TraesCS7B02G195500	CAMTA
	713	TraesCS7D02G150200	CAMTA
	714	TraesCS7D02G310000	CAMTA
	715	TraesCS7D02G386000	CAMTA
	716	TraesCSU02G079300	CAMTA
	717	TraesCSU02G185200	CAMTA
	718	TraesCSU02G185400	CAMTA
	719	TraesCS1A02G290900	CO-like
	720	TraesCS2B02G372000	CO-like
	721	TraesCS2D02G351900	CO-like
	722	TraesCS4A02G140600	CO-like
	723	TraesCS6B02G315400	CO-like
	724	TraesCS7D02G131700	CO-like
	725	TraesCS3A02G180600	Dof
	726	TraesCS3D02G185500	Dof
	727	TraesCS6A02G287700	Dof
	728	TraesCS6B02G317100	Dof
	729	TraesCS6D02G268400	Dof
	730	TraesCS2A02G100800	Dof
	731	TraesCS1A02G171300	Dof
	732	TraesCS2B02G118000	Dof
	733	TraesCS2D02G100300	Dof
	734	TraesCS2D02G563200	Dof
	735	TraesCS6A02G311700	E2F/DP
	736	TraesCS6B02G341900	E2F/DP
	737	TraesCS1A02G314300	ERF
	738	TraesCS1A02G370400	ERF
	739	TraesCS4A02G035400	ERF
	740	TraesCS4D02G267500	ERF
	741	TraesCS5B02G310800	ERF
	742	TraesCS5D02G200900	ERF
	743	TraesCS6B02G268100	ERF
	744	TraesCS7A02G057800	ERF
	745	TraesCS1B02G389800	ERF
	746	TraesCS7D02G052400	ERF
	747	TraesCS7D02G127600	ERF
	748	TraesCS7D02G469200	ERF
	749	TraesCS1D02G376500	ERF
	750	TraesCS1A02G231200	ERF
	751	TraesCS1B02G243200	ERF
	752	TraesCS1B02G460100	ERF
	753	TraesCS1D02G059000	ERF
	754	TraesCS2D02G397000	ERF
	755	TraesCS2D02G414300	ERF
	756	TraesCS3A02G536200	ERF
	757	TraesCS3B02G115400	ERF
	758	TraesCS3D02G430600	ERF
	759	TraesCS4A02G223300	ERF
	760	TraesCS4A02G227400	ERF
	761	TraesCS5A02G310000	ERF
	762	TraesCS5B02G024700	ERF
	763	TraesCS5B02G494300	ERF
	764	TraesCS5D02G033300	ERF
	765	TraesCS5D02G317100	ERF
	766	TraesCS5D02G317400	ERF
	767	TraesCS5D02G318300	ERF
	768	TraesCS5D02G554600	ERF
	769	TraesCS6A02G120000	ERF
	770	TraesCS6B02G274200	ERF
	771	TraesCS6B02G388800	ERF
	772	TraesCS6B02G463500	ERF
	773	TraesCS6B02G464300	ERF
	774	TraesCS6D02G366100	ERF
	775	TraesCS7D02G018900	ERF
	776	TraesCS1B02G115700	FAR1
	777	TraesCS1D02G096200	FAR1
	778	TraesCS2A02G497100	G2-like
	779	TraesCS2B02G525400	G2-like
	780	TraesCS4A02G327900	G2-like
	781	TraesCS6A02G108800	G2-like
	782	TraesCS6D02G097000	G2-like
	783	TraesCS4A02G059600	HD-ZIP
	784	TraesCS4B02G235300	HD-ZIP
	785	TraesCS4B02G287600	HD-ZIP
	786	TraesCS4D02G236600	HD-ZIP
	787	TraesCS5A02G316800	HD-ZIP
	788	TraesCS5B02G317400	HD-ZIP
	789	TraesCS2D02G387300	HD-ZIP
	790	TraesCS1A02G372900	HD-ZIP
	791	TraesCS1B02G393100	HD-ZIP
	792	TraesCS6A02G240400	HD-ZIP
	793	TraesCS6B02G284300	HD-ZIP
	794	TraesCS7D02G078900	HD-ZIP
	795	TraesCS4B02G383300	HSF
	796	TraesCS5B02G556200	HSF
	797	TraesCS1B02G396000	HSF
	798	TraesCS7B02G220200	MIKC_MADS
	799	TraesCS4D02G301100	MIKC_MADS
	800	TraesCS3D02G428000	M-type_MADS
	801	TraesCS4B02G351500	M-type_MADS
	802	TraesCS3A02G108000	MYB
	803	TraesCS1A02G366100	MYB
	804	TraesCS4A02G124900	MYB
	805	TraesCS4A02G173300	MYB
	806	TraesCS4B02G143700	MYB
	807	TraesCS4B02G179500	MYB
	808	TraesCS4B02G368000	MYB
	809	TraesCS4B02G368500	MYB
	810	TraesCS4D02G142300	MYB
	811	TraesCS4D02G181100	MYB
	812	TraesCS5B02G216900	MYB
	813	TraesCS6A02G037700	MYB
	814	TraesCS1B02G279400	MYB
	815	TraesCS6A02G236700	MYB
	816	TraesCS6A02G368200	MYB
	817	TraesCS6B02G349200	MYB
	818	TraesCS6D02G043600	MYB
	819	TraesCS6D02G210500	MYB
	820	TraesCS6D02G384500	MYB
	821	TraesCS7A02G514600	MYB
	822	TraesCS7B02G138200	MYB
	823	TraesCS7D02G130605	MYB
	824	TraesCSU02G015100	MYB
	825	TraesCS1D02G268900	MYB
	826	TraesCS2A02G541900	MYB
	827	TraesCS2B02G137700	MYB
	828	TraesCS2D02G094000	MYB
	829	TraesCS2D02G117400	MYB
	830	TraesCS2D02G156900	MYB
	831	TraesCS2D02G543500	MYB
	832	TraesCS1A02G268800	MYB
	833	TraesCS1A02G129300	MYB
	834	TraesCS1A02G365900	MYB
	835	TraesCS1A02G366200	MYB
	836	TraesCS1B02G100600	MYB
	837	TraesCS1B02G147800	MYB
	838	TraesCS1B02G383700	MYB
	839	TraesCS1B02G383800	MYB
	840	TraesCS1D02G125400	MYB
	841	TraesCS1D02G371400	MYB
	842	TraesCS1D02G371500	MYB
	843	TraesCS1D02G371700	MYB
	844	TraesCS1D02G371800	MYB
	845	TraesCS2A02G052400	MYB
	846	TraesCS2A02G370300	MYB
	847	TraesCS2A02G370400	MYB
	848	TraesCS2A02G370700	MYB
	849	TraesCS2A02G414800	MYB
	850	TraesCS2B02G387300	MYB
	851	TraesCS2B02G387700	MYB
	852	TraesCS2B02G387800	MYB
	853	TraesCS2D02G153200	MYB
	854	TraesCS2D02G153400	MYB
	855	TraesCS2D02G153500	MYB
	856	TraesCS2D02G287700	MYB
	857	TraesCS2D02G366800	MYB
	858	TraesCS2D02G366900	MYB
	859	TraesCS3A02G094300	MYB
	860	TraesCS3A02G153700	MYB
	861	TraesCS3D02G036200	MYB
	862	TraesCS3D02G094500	MYB
	863	TraesCS3D02G255400	MYB
	864	TraesCS4B02G231300	MYB
	865	TraesCS5A02G320500	MYB
	866	TraesCS5B02G410500	MYB
	867	TraesCS5D02G326600	MYB
	868	TraesCS6B02G053100	MYB
	869	TraesCS6B02G265200	MYB
	870	TraesCS6D02G219300	MYB
	871	TraesCS7A02G304500	MYB
	872	TraesCS7B02G320200	MYB
	873	TraesCS7D02G208000	MYB
	874	TraesCS7D02G300000	MYB
	875	TraesCSU02G023000	MYB
	876	TraesCS1A02G274300	MYB_related
	877	TraesCS3A02G102400	MYB_related
	878	TraesCS1A02G290400	MYB_related
	879	TraesCS3A02G258800	MYB_related
	880	TraesCS3A02G512500	MYB_related
	881	TraesCS3A02G538000	MYB_related
	882	TraesCS3B02G005900	MYB_related
	883	TraesCS3B02G178100	MYB_related
	884	TraesCS3B02G311700	MYB_related
	885	TraesCS1A02G361700	MYB_related
	886	TraesCS1A02G363000	MYB_related
	887	TraesCS3B02G601700	MYB_related
	888	TraesCS3D02G033800	MYB_related
	889	TraesCS3D02G034200	MYB_related
	890	TraesCS3D02G159100	MYB_related
	891	TraesCS3D02G203400	MYB_related
	892	TraesCS3D02G417500	MYB_related
	893	TraesCS4A02G022500	MYB_related
	894	TraesCS1A02G038200	MYB_related
	895	TraesCS4A02G046000	MYB_related
	896	TraesCS1B02G007900	MYB_related
	897	TraesCS4A02G099100	MYB_related
	898	TraesCS4A02G140000	MYB_related
	899	TraesCS4A02G313600	MYB_related
	900	TraesCS4B02G205200	MYB_related
	901	TraesCS4B02G247500	MYB_related
	902	TraesCS4B02G301600	MYB_related
	903	TraesCS4D02G086400	MYB_related
	904	TraesCS4D02G246300	MYB_related
	905	TraesCS4D02G271000	MYB_related
	906	TraesCS4D02G271100	MYB_related
	907	TraesCS4D02G299900	MYB_related
	908	TraesCS4D02G305900	MYB_related
	909	TraesCS4D02G357200	MYB_related
	910	TraesCS5A02G090600	MYB_related
	911	TraesCS5A02G395600	MYB_related
	912	TraesCS5A02G502300	MYB_related
	913	TraesCS5B02G156500	MYB_related
	914	TraesCS5B02G400400	MYB_related
	915	TraesCS5B02G442900	MYB_related
	916	TraesCS5B02G458200	MYB_related
	917	TraesCS5B02G464900	MYB_related
	918	TraesCS5B02G491500	MYB_related
	919	TraesCS5B02G566100	MYB_related
	920	TraesCS5D02G044700	MYB_related
	921	TraesCS1B02G232800	MYB_related
	922	TraesCS5D02G162500	MYB_related
	923	TraesCS5D02G206200	MYB_related
	924	TraesCS5D02G218800	MYB_related
	925	TraesCS5D02G491900	MYB_related
	926	TraesCS6A02G034300	MYB_related
	927	TraesCS6A02G034600	MYB_related
	928	TraesCS6A02G035200	MYB_related
	929	TraesCS6A02G071100	MYB_related
	930	TraesCS1B02G283700	MYB_related
	931	TraesCS6A02G261100	MYB_related
	932	TraesCS6A02G315800	MYB_related
	933	TraesCS6A02G392500	MYB_related
	934	TraesCS6A02G403200	MYB_related
	935	TraesCS6B02G048600	MYB_related
	936	TraesCS6B02G048700	MYB_related
	937	TraesCS6B02G049000	MYB_related
	938	TraesCS6B02G049200	MYB_related
	939	TraesCS6B02G049400	MYB_related
	940	TraesCS6B02G082000	MYB_related
	941	TraesCS6B02G084700	MYB_related
	942	TraesCS6B02G288500	MYB_related
	943	TraesCS6B02G327200	MYB_related
	944	TraesCS6D02G040700	MYB_related
	945	TraesCS6D02G062300	MYB_related
	946	TraesCS6D02G069000	MYB_related
	947	TraesCS6D02G241900	MYB_related
	948	TraesCS6D02G303200	MYB_related
	949	TraesCS1B02G378400	MYB_related
	950	TraesCS1B02G378600	MYB_related
	951	TraesCS1B02G383400	MYB_related
	952	TraesCS1B02G386400	MYB_related
	953	TraesCS1B02G387100	MYB_related
	954	TraesCS7A02G065100	MYB_related
	955	TraesCS7A02G201200	MYB_related
	956	TraesCS7A02G437900	MYB_related
	957	TraesCS7A02G480100	MYB_related
	958	TraesCS7B02G104900	MYB_related
	959	TraesCS7B02G105100	MYB_related
	960	TraesCS7B02G105200	MYB_related
	961	TraesCS7B02G337500	MYB_related
	962	TraesCS7B02G478200	MYB_related
	963	TraesCS7D02G211000	MYB_related
	964	TraesCS1D02G039800	MYB_related
	965	TraesCS7D02G302800	MYB_related
	966	TraesCS7D02G428300	MYB_related
	967	TraesCS7D02G540700	MYB_related
	968	TraesCSU02G076600	MYB_related
	969	TraesCSU02G142200	MYB_related
	970	TraesCSU02G182300	MYB_related
	971	TraesCSU02G226400	MYB_related
	972	TraesCS1D02G096300	MYB_related
	973	TraesCS1A02G102700	MYB_related
	974	TraesCS1D02G289100	MYB_related
	975	TraesCS1D02G366400	MYB_related
	976	TraesCS2A02G124200	MYB_related
	977	TraesCS2B02G227000	MYB_related
	978	TraesCS2B02G478700	MYB_related
	979	TraesCS2B02G615100	MYB_related
	980	TraesCS1A02G219400	MYB_related
	981	TraesCS1A02G228800	MYB_related
	982	TraesCS1A02G229000	MYB_related
	983	TraesCS2D02G220500	MYB_related
	984	TraesCS2D02G417800	MYB_related
	985	TraesCS2D02G460200	MYB_related
	986	TraesCS2D02G543600	MYB_related
	987	TraesCS2D02G583700	MYB_related
	988	TraesCS1A02G107700	MYB_related
	989	TraesCS1A02G295800	MYB_related
	990	TraesCS1B02G129800	MYB_related
	991	TraesCS1B02G210700	MYB_related
	992	TraesCS1D02G111400	MYB_related
	993	TraesCS1D02G395300	MYB_related
	994	TraesCS2A02G104700	MYB_related
	995	TraesCS2A02G162300	MYB_related
	996	TraesCS2A02G338100	MYB_related
	997	TraesCS2A02G456600	MYB_related
	998	TraesCS2B02G124500	MYB_related
	999	TraesCS2B02G174600	MYB_related
	1000	TraesCS2B02G278200	MYB_related
	1001	TraesCS2B02G440800	MYB_related
	1002	TraesCS2D02G108500	MYB_related
	1003	TraesCS2D02G154600	MYB_related
	1004	TraesCS3A02G122500	MYB_related
	1005	TraesCS3A02G276100	MYB_related
	1006	TraesCS3A02G325400	MYB_related
	1007	TraesCS3B02G458600	MYB_related
	1008	TraesCS3D02G164600	MYB_related
	1009	TraesCS3D02G318700	MYB_related
	1010	TraesCS4A02G003800	MYB_related
	1011	TraesCS4A02G345400	MYB_related
	1012	TraesCS4A02G452600	MYB_related
	1013	TraesCS4D02G225900	MYB_related
	1014	TraesCS5A02G085300	MYB_related
	1015	TraesCS5A02G200500	MYB_related
	1016	TraesCS5A02G390000	MYB_related
	1017	TraesCS5A02G441100	MYB_related
	1018	TraesCS5A02G465500	MYB_related
	1019	TraesCS5B02G102900	MYB_related
	1020	TraesCS5B02G395000	MYB_related
	1021	TraesCS5D02G361800	MYB_related
	1022	TraesCS5D02G362100	MYB_related
	1023	TraesCS5D02G373900	MYB_related
	1024	TraesCS5D02G399800	MYB_related
	1025	TraesCS5D02G478400	MYB_related
	1026	TraesCS6B02G046400	MYB_related
	1027	TraesCS6B02G346200	MYB_related
	1028	TraesCS6D02G061300	MYB_related
	1029	TraesCS6D02G295000	MYB_related
	1030	TraesCS7A02G036100	MYB_related
	1031	TraesCS7A02G198800	MYB_related
	1032	TraesCS7B02G058200	MYB_related
	1033	TraesCS7D02G032700	MYB_related
	1034	TraesCS7D02G139500	MYB_related
	1035	TraesCS7D02G262400	MYB_related
	1036	TraesCS3A02G339600	NAC
	1037	TraesCS3D02G401200	NAC
	1038	TraesCS4A02G131000	NAC
	1039	TraesCS4A02G421300	NAC
	1040	TraesCS5A02G049100	NAC
	1041	TraesCS5A02G468300	NAC
	1042	TraesCS5B02G054200	NAC
	1043	TraesCS5B02G142100	NAC
	1044	TraesCS5D02G059700	NAC
	1045	TraesCS5D02G148800	NAC
	1046	TraesCS5D02G481200	NAC
	1047	TraesCS6A02G057400	NAC
	1048	TraesCS6A02G158600	NAC
	1049	TraesCS6A02G378600	NAC
	1050	TraesCS6B02G075200	NAC
	1051	TraesCS6B02G416300	NAC
	1052	TraesCS6D02G059300	NAC
	1053	TraesCS6D02G362900	NAC
	1054	TraesCS7A02G068300	NAC
	1055	TraesCS7A02G263100	NAC
	1056	TraesCS7A02G549000	NAC
	1057	TraesCS7B02G160900	NAC
	1058	TraesCS7D02G062100	NAC
	1059	TraesCS2A02G101900	NAC
	1060	TraesCS2A02G102000	NAC
	1061	TraesCS2A02G338300	NAC
	1062	TraesCS2B02G343600	NAC
	1063	TraesCS2B02G067400	NAC
	1064	TraesCS2B02G119100	NAC
	1065	TraesCS2B02G355600	NAC
	1066	TraesCS2D02G101400	NAC
	1067	TraesCS2D02G305300	NAC
	1068	TraesCS3D02G367900	NAC
	1069	TraesCS4A02G419900	NAC
	1070	TraesCS4A02G420100	NAC
	1071	TraesCS4A02G421000	NAC
	1072	TraesCS4B02G067100	NAC
	1073	TraesCS4D02G175700	NAC
	1074	TraesCS5A02G127200	NAC
	1075	TraesCS5D02G534600	NAC
	1076	TraesCS6A02G208900	NAC
	1077	TraesCS6B02G237900	NAC
	1078	TraesCS6D02G192400	NAC
	1079	TraesCS7A02G068000	NAC
	1080	TraesCS7D02G062400	NAC
	1081	TraesCS7D02G062600	NAC
	1082	TraesCS4A02G293000	NF-YB
	1083	TraesCS4D02G018500	NF-YB
	1084	TraesCS2A02G173500	NF-YB
	1085	TraesCS2B02G199800	NF-YB
	1086	TraesCS2D02G180700	NF-YB
	1087	TraesCS4A02G306400	NF-YB
	1088	TraesCS4B02G008300	NF-YB
	1089	TraesCS4D02G007000	NF-YB
	1090	TraesCS5D02G265000	NF-YC
	1091	TraesCS2D02G388800	NF-YC
	1092	TraesCS7A02G475400	NF-YC
	1093	TraesCS3A02G157000	Nin-like
	1094	TraesCS4B02G178900	Nin-like
	1095	TraesCS4D02G149400	Nin-like
	1096	TraesCS5A02G455900	Nin-like
	1097	TraesCS5B02G552800	Nin-like
	1098	TraesCS5B02G553000	Nin-like
	1099	TraesCS5B02G553100	Nin-like
	1100	TraesCS5D02G538900	Nin-like
	1101	TraesCS5D02G539500	Nin-like
	1102	TraesCS7A02G438400	Nin-like
	1103	TraesCS7A02G543000	Nin-like
	1104	TraesCS7A02G549500	Nin-like
	1105	TraesCS7B02G110100	Nin-like
	1106	TraesCS2A02G352400	Nin-like
	1107	TraesCS1A02G169300	Nin-like
	1108	TraesCS2B02G194700	Nin-like
	1109	TraesCS2D02G039600	Nin-like
	1110	TraesCS2D02G336600	Nin-like
	1111	TraesCS2B02G348700	Nin-like
	1112	TraesCS2D02G128900	Nin-like
	1113	TraesCS3A02G340900	Nin-like
	1114	TraesCS4B02G286700	Nin-like
	1115	TraesCS5B02G436300	Nin-like
	1116	TraesCS5B02G439500	Nin-like
	1117	TraesCS5B02G455600	Nin-like
	1118	TraesCS5B02G477300	Nin-like
	1119	TraesCS5D02G444000	Nin-like
	1120	TraesCS5D02G466700	Nin-like
	1121	TraesCS6D02G308500	Nin-like
	1122	TraesCS5A02G300400	SBP
	1123	TraesCS5A02G007800	TALE
	1124	TraesCS7A02G511800	TALE
	1125	TraesCS4A02G252100	TALE
	1126	TraesCS4B02G063100	TALE
	1127	TraesCS4D02G062100	TALE
	1128	TraesCS3D02G534000	Trihelix
	1129	TraesCS6A02G368400	Trihelix
	1130	TraesCS1B02G308600	Trihelix
	1131	TraesCS6B02G403900	Trihelix
	1132	TraesCS6D02G351300	Trihelix
	1133	TraesCS2D02G387100	Trihelix
	1134	TraesCS3A02G233800	WRKY
	1135	TraesCS1A02G025600	WRKY
	1136	TraesCS1A02G358400	WRKY
	1137	TraesCS3D02G219600	WRKY
	1138	TraesCS3D02G473700	WRKY
	1139	TraesCS3D02G485300	WRKY
	1140	TraesCS4B02G091600	WRKY
	1141	TraesCS5A02G028900	WRKY
	1142	TraesCS5B02G145400	WRKY
	1143	TraesCS5B02G304900	WRKY
	1144	TraesCS5D02G311300	WRKY
	1145	TraesCS7A02G103400	WRKY
	1146	TraesCS7A02G508700	WRKY
	1147	TraesCS7A02G508800	WRKY
	1148	TraesCS7B02G419400	WRKY
	1149	TraesCS7D02G039800	WRKY
	1150	TraesCS7D02G497300	WRKY
	1151	TraesCS7D02G497800	WRKY
	1152	TraesCS1D02G363300	WRKY
	1153	TraesCS2B02G187500	WRKY
	1154	TraesCS2D02G168600	WRKY
	1155	TraesCS2D02G489700	WRKY
	1156	TraesCS1A02G025500	WRKY
	1157	TraesCS1A02G426000	WRKY
	1158	TraesCS1B02G006900	WRKY
	1159	TraesCS1B02G021900	WRKY
	1160	TraesCS1B02G183000	WRKY
	1161	TraesCS1D02G174400	WRKY
	1162	TraesCS1D02G454100	WRKY
	1163	TraesCS2A02G503900	WRKY
	1164	TraesCS2A02G590100	WRKY
	1165	TraesCS3B02G587400	WRKY
	1166	TraesCS3D02G056400	WRKY
	1167	TraesCS4A02G314400	WRKY
	1168	TraesCS4A02G402100	WRKY
	1169	TraesCS4A02G461700	WRKY
	1170	TraesCS4D02G089800	WRKY
	1171	TraesCS5A02G073300	WRKY
	1172	TraesCS5A02G304400	WRKY
	1173	TraesCS5B02G027700	WRKY
	1174	TraesCS5D02G032300	WRKY
	1175	TraesCS5D02G098500	WRKY
	1176	TraesCS5D02G312800	WRKY
	1177	TraesCS6A02G414300	WRKY
	1178	TraesCS6B02G153000	WRKY
	1179	TraesCS6B02G447100	WRKY
	1180	TraesCS6D02G052200	WRKY
	1181	TraesCS7A02G039100	WRKY
	1182	TraesCS7A02G046300	WRKY
	1183	TraesCS7B02G418600	WRKY
	1184	TraesCS7D02G041100	WRKY
	1185	TraesCS7D02G097200	WRKY
	1186	TraesCS7D02G131300	WRKY
	1187	TraesCS7D02G497700	WRKY
	1188	TraesCS2B02G505400	ZF-HD
